# Supplementary material
Source: PubMed Central journal article supplement (PMC3957618)
Supplement: AEM.03411-13_zam999105167so1.pdf [file AEM.03411-13_zam999105167so1.pdf]

# 1 Supplemental Data

2

3

4 **Table S1:** List of primers used in comparative qRT-PCR.

| Gene    | Descriptions                                                                                                                                                                     | GenBank Accession Number | Primer sequences                                           | Amplicon Length (bp) | Efficiency | References                                  |
|---------|----------------------------------------------------------------------------------------------------------------------------------------------------------------------------------|--------------------------|------------------------------------------------------------|----------------------|------------|---------------------------------------------|
| ACTB    | Involved in various types of cell motility and ubiquitously expressed in all eukaryotic cells used as a reference gene                                                           | NM_001101                | F: TTGTTACAGGAAGTCCCTTGCC<br>R: ATGCTATCACCTCCCTGTGTG      | 101                  | 1.90       | (Nagao <i>et al.</i> , 2000)                |
| B2M     | Serum protein involved in a complex with another protein on the surface of nearly all nucleated cells used as a reference gene                                                   | NM_004048                | F: GTGCTCGGCTACTCTCTC<br>R: GTCAACTTCAATGTCGGAT            | 150                  | 1.91       | (Dydensborg <i>et al.</i> , 2006)           |
| CXCL10  | Chemokine resulting in pleiotropic effects, including stimulation of monocytes, natural killer and T-cell migration, and modulation of adhesion molecule expression              | NM_001565.3              | F: TTCAAGGAGTACCTCTCTCTAG<br>R: CTGGATTACAGACATCTCTCTC     | 177                  | 1.95       | (Tamassia <i>et al.</i> , 2008)             |
| DUSP1   | Play a role in the human cellular response to environmental stress as a negative regulator of MAPK signaling pathway                                                             | NM_004417                | F: GGCCCCGAGAACAGACAAA<br>R: GTGCCCACTCCATGACCAT           | 80                   | 1.97       | (Locati <i>et al.</i> , 2002)               |
| FOS     | Protein associates with JUN to form the AP-1 complex (transcription factor) which leads to regulation of cell proliferation, differentiation and transformation                  | NM_005252.3              | F: AAAAGGAGAATCCGAAGGGAAA<br>R: GTCTGTCTCCGCTTGAGGTGTAT    | 96                   | 1.96       | (Reichelt <i>et al.</i> , 2003)             |
| JUN     | Protein associates with FOS to form the AP-1 complex (transcription factor) which leads to regulation of cell proliferation, differentiation and transformation                  | NM_002228.3              | F: ATGACTGCAAAGATGGAAACGA<br>R: GCTCTCGACGGGAGGAA          | 69                   | 2.0        | (Reichelt <i>et al.</i> , 2003)             |
| IL8     | One of the major chemokine mediators of the inflammatory response.                                                                                                               | NM_000584                | F: GAATGGGTTTGTAGAAATGTGATA<br>R: CAGACTAGGGTTGCCAGATTTAAC | 129                  | 1.93       | (Birkenkamp-Demtroder <i>et al.</i> , 2002) |
| IL17C   | T cell-derived cytokine that stimulates the release of tumor necrosis factor alpha and IL-1-beta                                                                                 | NM_013278.3              | F: CAGCTTCTGTGGATAGCGGT<br>R: GAGGTGTTGGAGGCAGACA          | 90                   | 1.98       | qPrimerDep or NM_013278                     |
| IL28B   | Cytokine with immunomodulatory activity and potent antiviral activity                                                                                                            | NM_172139.2              | F: TGGCCCTGACGCTGAAGGTT<br>R: CGTGGGCTGAGGCTGGATAC         | 134                  | 1.98       | (Nudelman <i>et al.</i> , 2010)             |
| IL29    | Cytokine with immunomodulatory activity and possible role in antiviral immunity                                                                                                  | NM_172140.1              | F: GCCTCTCACCGGAGACCTC<br>R: GGAGTAGGGCTCAGCGCATA          | 116                  | 1.97       | (Nudelman <i>et al.</i> , 2010)             |
| IRF1    | Interferon regulatory factor 1, transcriptional activator for IFNA, IFNB and IFN-gamma stimulated genes                                                                          | NM_002198                | F: AAAAGGAGCCAGATCCCAAGA<br>R: CATCCGGTACACTCGCACAG        | 128                  | 2.0        | RTPrimerDB ID: 3825                         |
| MAP3K14 | Protein kinase binding to TRAF2 and is an activator of the NF-kB complex.                                                                                                        | NM_003954.2              | F: GGAATACCTCCACTCAGGAAGG<br>R: CTGTGAGCAAGGACTTCCAG       | 149                  | 1.98       | OriGene Technologies                        |
| NFKB1   | Rapidly acting primary transcription factor found in all cell types involved in stimuli such as cytokines and stress and key role in regulating the immune response to infection | NM_003998.3              | F: GCAGCACTACTTCTGACCACC<br>R: TCTGCTCCTGAGCATGACGTC       | 130                  | 1.97       | OriGene Technologies                        |
| NFKBIA  | Inhibits the activity of the NF-kappa-B (NFKB) protein complex.                                                                                                                  | NM_020529                | F: GGTGAAGGGAGACCTGGCTT<br>R: GTGCCTCAGCAATTTCTGGC         | 101                  | 1.99       | (Mookherjee <i>et al.</i> , 2006)           |
| RPLP0   | Ribosomal protein P0 used as a reference gene                                                                                                                                    | NM_001002                | F: GCAATGTTGCCAGTGTCTG<br>R: GCCTTGACCTTTTCAGCAA           | 142                  | 1.90       | (Dydensborg <i>et al.</i> , 2006)           |
| TNF     | Proinflammatory cytokine                                                                                                                                                         | NM_000594                | F: CCCAGGGACCTCTCTAATCA<br>R: GCTACAGGCTTGCACTCGG          | 81                   | 1.96       | (Uray <i>et al.</i> , 2002)                 |

5

## 6 References

7

8 Birkenkamp-Demtroder, K., Christensen, L.L., Olesen, S.H., Frederiksen, C.M., Laiho,  
9 P., Aaltonen, L.A., *et al.* (2002). Gene expression in colorectal cancer. *Cancer*  
10 *Res* **62**, 4352-4363.

11

12 Dydensborg, A.B., Herring, E., Auclair, J., Tremblay, E. and Beaulieu, J.F. (2006).  
13 Normalizing genes for quantitative RT-PCR in differentiating human intestinal  
14 epithelial cells and adenocarcinomas of the colon. *Am J Physiol Gastrointest*  
15 *Liver Physiol* **290**, G1067-1074.

16

17 Locati, M., Deuschle, U., Massardi, M.L., Martinez, F.O., Sironi, M., Sozzani, S., *et al.*  
18 (2002). Analysis of the gene expression profile activated by the CC chemokine  
19 ligand 5/RANTES and by lipopolysaccharide in human monocytes. *Journal of*  
20 *immunology* **168**, 3557-3562.

21 Mookherjee, N., Brown, K.L., Bowdish, D.M., Doria, S., Falsafi, R., Hokamp, K., *et al.*  
22 (2006). Modulation of the TLR-mediated inflammatory response by the  
23 endogenous human host defense peptide LL-37. *Journal of immunology* **176**,  
24 2455-2464.  
25  
26 Nagao, M., Nakajima, Y., Kanehiro, H., Hisanaga, M., Aomatsu, Y., Ko, S., *et al.* (2000).  
27 The impact of interferon gamma receptor expression on the mechanism of escape  
28 from host immune surveillance in hepatocellular carcinoma. *Hepatology* **32**, 491-  
29 500.  
30  
31 Nudelman, G., Ge, Y., Hu, J., Kumar, M., Seto, J., Duke, J.L., *et al.* (2010). Coregulation  
32 mapping based on individual phenotypic variation in response to virus infection.  
33 *Immunome Res* **6**, 2.  
34  
35 Reichelt, W.H., Yndestad, A., Wright, M.S., Elgjo, K., Haug, T. and Reichelt, K.L.  
36 (2003). The colon mitosis-inhibitor pyroglutamyl-histidyl-glycine alters  
37 expression of immediate-early cancer-related genes in HT-29 cells. *Anticancer*  
38 *Res* **23**, 1229-1234.  
39  
40 Tamassia, N., Le Moigne, V., Rossato, M., Donini, M., McCartney, S., Calzetti, F., *et al.*  
41 (2008). Activation of an immunoregulatory and antiviral gene expression program  
42 in poly(I:C)-transfected human neutrophils. *Journal of immunology* **181**, 6563-  
43 6573.  
44  
45 Uray, I.P., Connelly, J.H., Thomazy, V., Shipley, G.L., Vaughn, W.K., Frazier, O.H., *et*  
46 *al.* (2002). Left ventricular unloading alters receptor tyrosine kinase expression in  
47 the failing human heart. *J Heart Lung Transplant* **21**, 771-782.  
48
